# Supplementary material for: Recyclable polyether–polyquaternium grafted SiO2 microsphere for efficient treatment of ASP flooding-produced water: oil adsorption characteristics and mechanism
Source: Royal Society of Chemistry journal article supplement (doi:10.1039/d0ra00597e), 2020-01-01
Supplement: d0ra00597e1.pdf [file d0ra00597e1.pdf]

Supplementary Materials

**Recyclable polyether-polyquaternium grafted SiO<sub>2</sub> microsphere for efficient treatment of ASP**

**flooding-produced water: Oil adsorption characteristics and mechanism**

Hao Sun <sup>a,b</sup>, Xin He <sup>c</sup>, Qian Tang <sup>a,b</sup>, Xiaobing Li <sup>a,b,\*</sup>

<sup>a</sup>National Engineering Research Center of Coal Preparation and Purification, China University of Mining and Technology, Xuzhou 221116, Jiangsu, China

<sup>b</sup>School of Chemical Engineering and Technology, China University of Mining and Technology, Xuzhou 221116, Jiangsu, China

<sup>c</sup>Key Laboratory of Coalbed Methane Resources and Reservoir Formation Process of Ministry of Education, China University of Mining and Technology, Xuzhou 221008, China

Corresponding Author: Xiaobing Li, (+86)13512568890

Corresponding Author's email: Xiaobing.li@cumt.edu.cn

Mailing address: National Engineering Research Center of Coal Preparation and Purification, China University of Mining and Technology, Xuzhou 221116, Jiangsu, China

Number of pages: 6; number of Figures: 5.

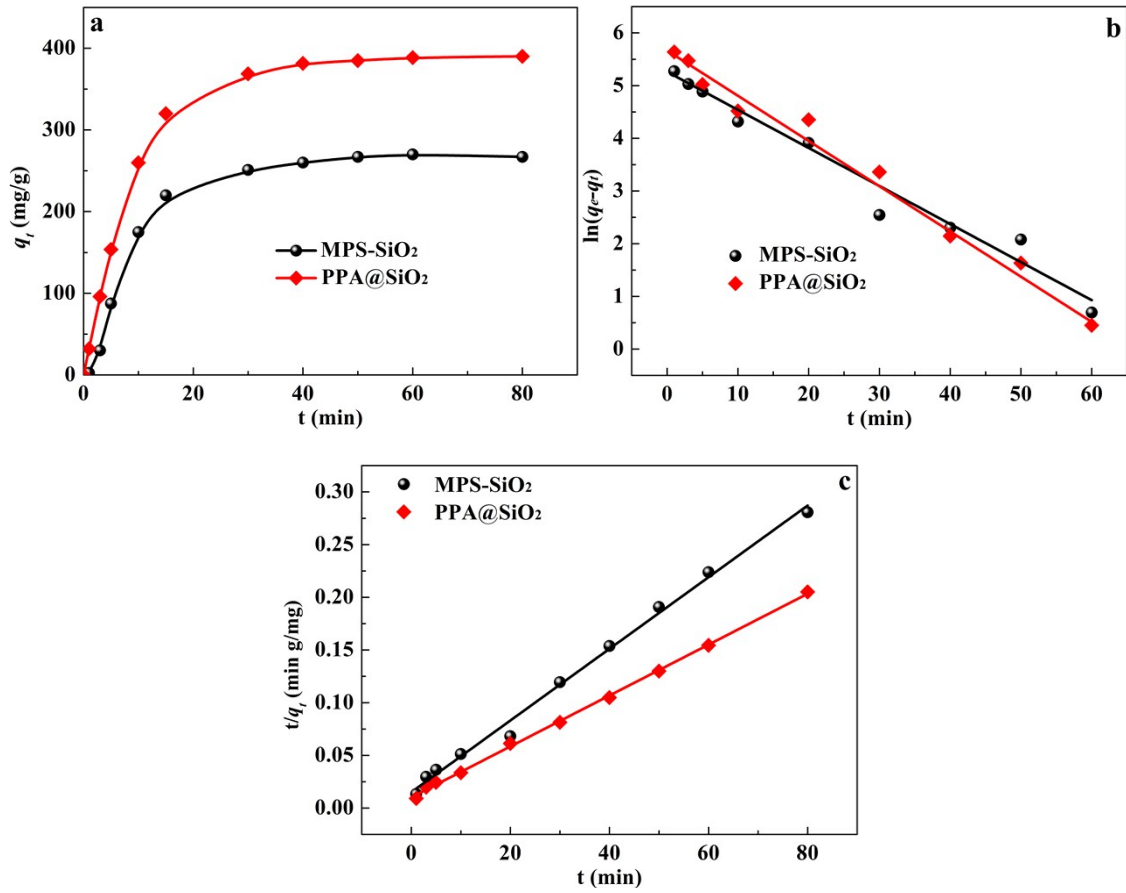

Fig. S1 Effect of contact time on oil adsorption (a); adsorption kinetics of oil onto MPS-SiO<sub>2</sub> and PPA@SiO<sub>2</sub> microspheres fitted with pseudo-first order and pseudo-second order models

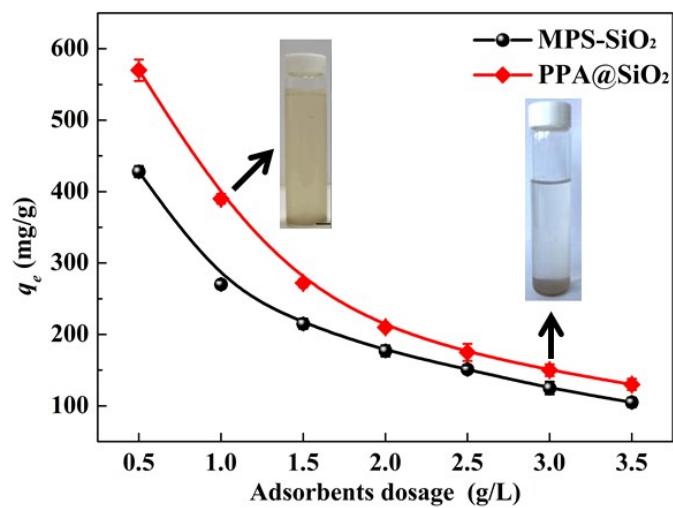

Fig. S2 Effect of adsorbents dosage on the oil adsorption capacity

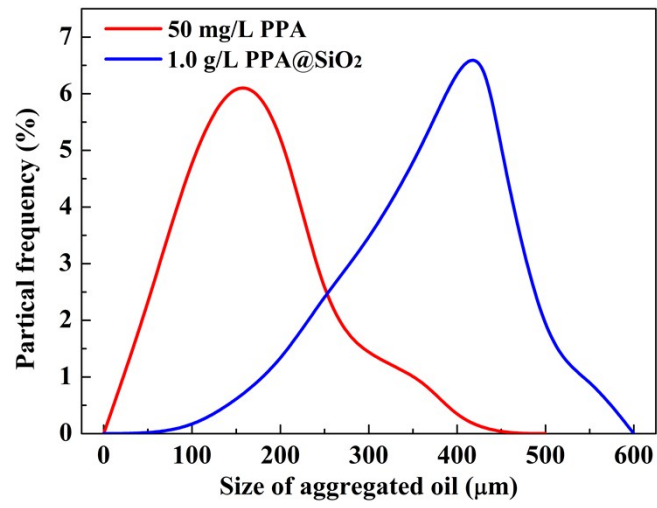

Fig. S3 Oil droplet size distributions at 50 mg/L PPA dosage and 1.0 g/L PPA@SiO<sub>2</sub> dosage

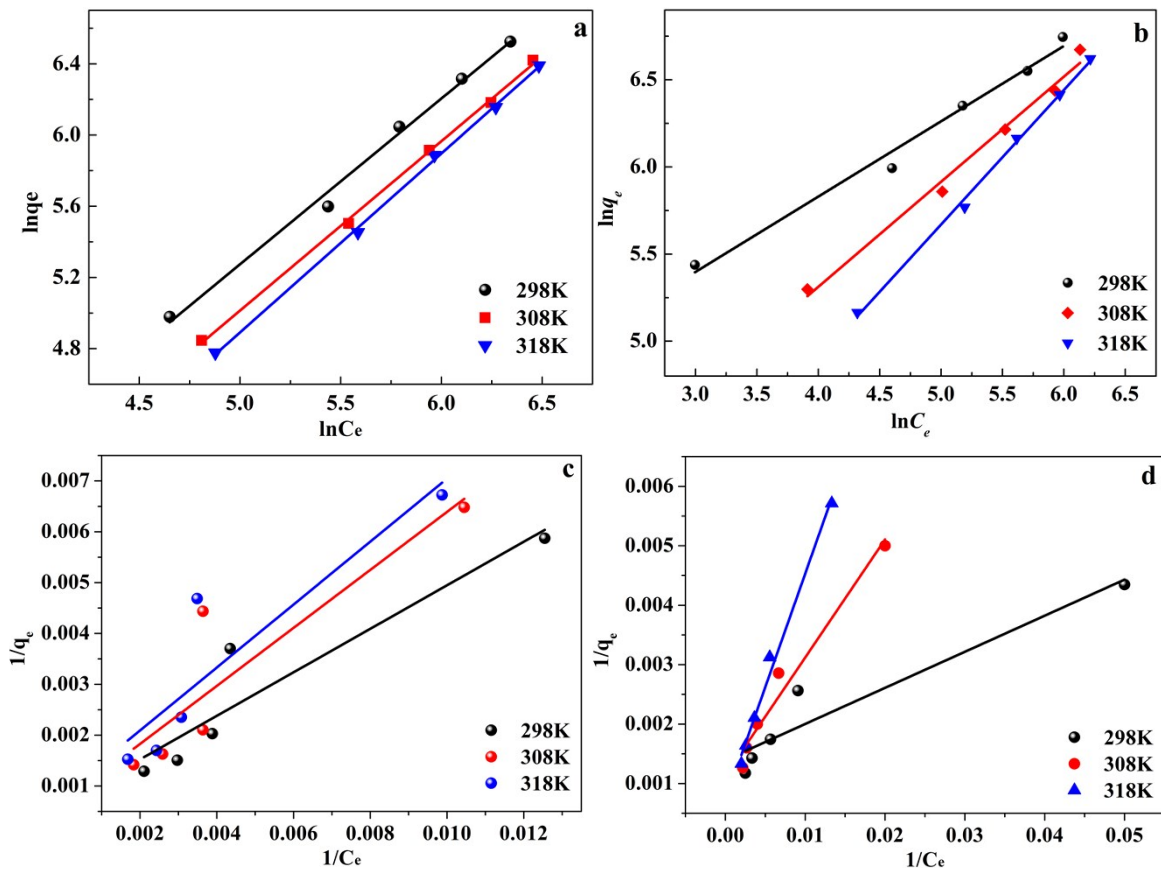

Fig. S4 Freundlich model plots of a. MPS-SiO<sub>2</sub>, b. PPA@SiO<sub>2</sub> microspheres and Langmuir model plots of c. MPS-SiO<sub>2</sub>, d. PPA@SiO<sub>2</sub> microspheres at various temperatures

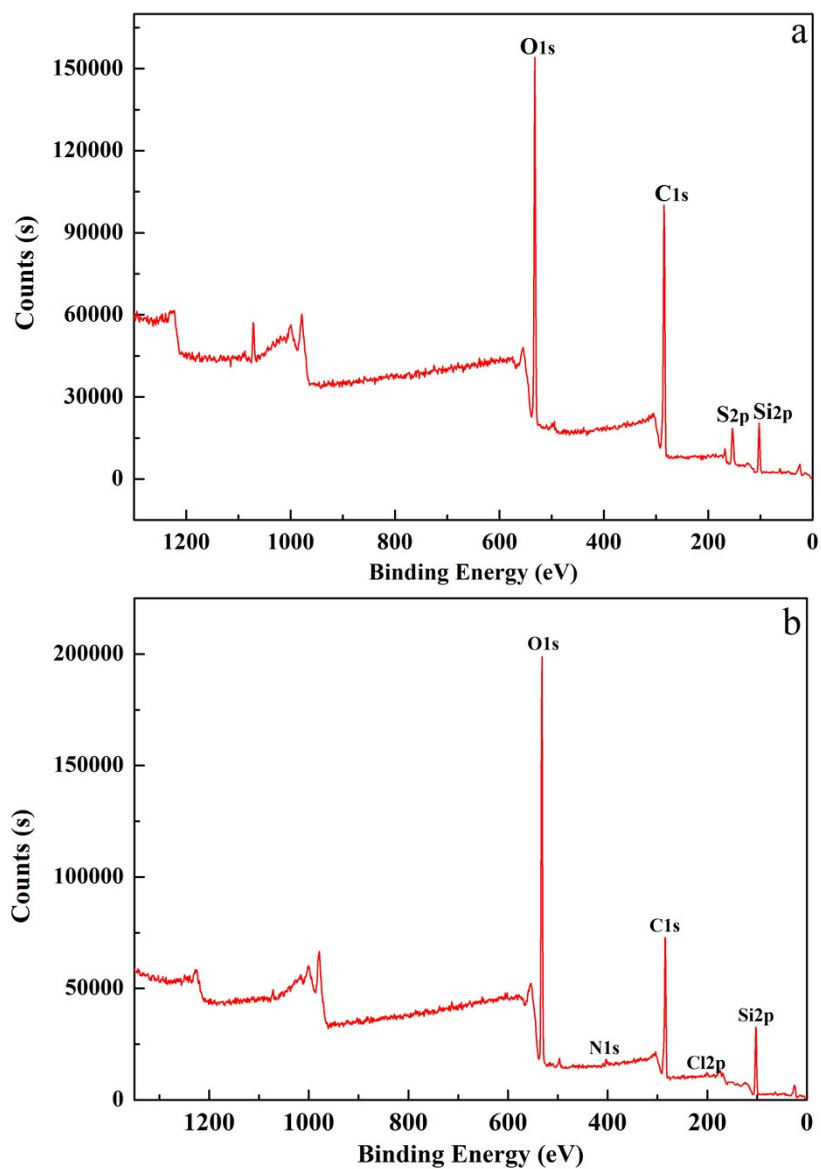

Fig. S5 XPS spectrum of the oil-loaded (a) PPA@SiO<sub>2</sub> and (b) recycled carrier particles
